# Supplementary material
Source: PubMed Central journal article supplement (PMC7549366)
Supplement: JB.00400-20-s0001.pdf [file JB.00400-20-s0001.pdf]

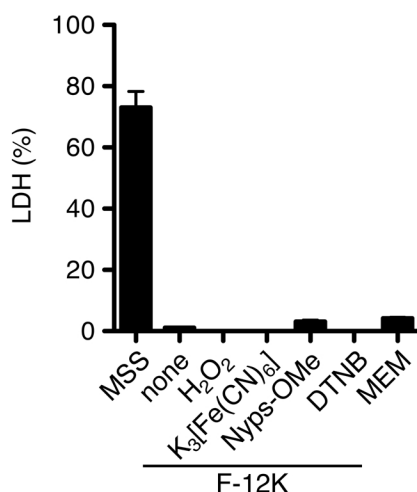

**Fig. S1.** Cytotoxic activity of *B. pertussis* Tohama I in F-12K medium containing oxidizing agents. L2 cells were infected with *B. pertussis* Tohama I in the modified SS medium (SS\_1/20AsA\_1/2CaA, MSS). The amounts of ascorbic acid and casamino acids in MSS are one-twentieth of, and one-half of those in SS medium, respectively. L2 cells were also infected in F-12K medium (none), F-12K medium containing hydrogen peroxide (H<sub>2</sub>O<sub>2</sub>), potassium ferricyanide(III) (K<sub>3</sub>[Fe(CN)<sub>6</sub>]), methyl 3-nitro-2-pyridinesulfenate (Npys-OMe) or 5,5'-dithiobis(2-nitrobenzoic acid) (DTNB). The final concentrations of each oxidizing agent were 1 mM, 1 mM, 10 μM, or 2 mM, respectively. Minimum Essential Medium Eagle (MEM) was also used. The cells were infected at an MOI of 500 for 3 hr. The amounts of LDH released into the extracellular medium from infected cells are shown, and the relative cytotoxicity (%) was determined as described in the Materials and Methods section. Error bars are the SEM from triplicate experiments. Experiments were performed at least three times, and representative data are shown.
